# Supplementary material for: Identification of Urine Biomarkers to Improve Eligibility for Prostate Biopsy and Detect High-Grade Prostate Cancer
Source: MDPI journal article supplement (doi:10.3390/cancers14051135), 2022-02-23
Supplement: s1 [file s1]

**Table S1:** Commercial ELISA kits used for the validation of biomarker candidates.

| Target | ELISA Catalogue Number | ELISA Producer                                | Notes                     |
|--------|------------------------|-----------------------------------------------|---------------------------|
| CD99   | ELH-CD99               | RayBiotech (Peachtree Corners, GA, USA)       | -                         |
| HRNR   | LS-F8355               | LifeSpan BioScience (Seattle, WA, USA)        | -                         |
| KRT13  | LS-F36678              | LifeSpan BioScience (Seattle, WA, USA)        | -                         |
| FCER2  | LS-F2751               | LifeSpan BioScience (Seattle, WA, USA)        | -                         |
| PEDF   | LS-F33276              | LifeSpan BioScience (Seattle, WA, USA)        | -                         |
| HPX    | EH238RB                | Thermo Fisher Scientific (Basel, Switzerland) | -                         |
| CANX   | ABIN6965340            | Antibodies Online (Aachen, Germany)           | -                         |
| CD44   | ab45912                | Abcam (Cambridge, UK)                         | Samples diluted 1:100/200 |
| RNASE2 | 7630                   | MBL Int. Corp. (Woburn, MA, USA)              | Samples diluted 1:50      |

**Table S2:** Antibodies used for the immunohistochemical staining of prostate tissues.

| Target | Antibody clone | Antibody Producer       | Dilution |
|--------|----------------|-------------------------|----------|
| CD99   | HO36-1.1       | Novocastra Laboratories | 1:25     |
| HRNR   | polyclonal     | Sigma Aldrich           | 1:500    |
| KRT13  | KS-1A3         | Novocastra Laboratories | 1:500    |
| FCER2  | 1B12           | Novocastra Laboratories | 1:20     |
| PEDF   | polyclonal     | Sigma Aldrich           | 1:50     |
| HPX    | EPR5610        | Abcam                   | 1:500    |
| CANX   | polyclonal     | Invitrogen              | 1:500    |

**Table S3:** Ranked candidate biomarkers from the MS screening for the detection of PCa. The ranking is based on thresholds for q-values and fold change, resulting in 351 protein candidates.

| Accession ID  | Genes     | Condition Numerator | Condition Denominator | AVG Log2 Ratio | Absolute AVG Log2 Ratio | Pvalue   | Qvalue     | % Change    | Ratio      |
|---------------|-----------|---------------------|-----------------------|----------------|-------------------------|----------|------------|-------------|------------|
| P36955        | SERPINF1  | 6+7+8+9             | 0                     | -1.03931989    | 1.03931989              | 8.60E-12 | 9.61E-09   | -51.344321  | 0.48655679 |
| P27797        | CALR      | 6+7+8+9             | 0                     | -0.86009261    | 0.86009261              | 3.86E-10 | 2.16E-07   | -44.9082809 | 0.55091719 |
| P02790        | HPX       | 6+7+8+9             | 0                     | -0.95244333    | 0.95244333              | 4.25E-09 | 1.58E-06   | -48.3243453 | 0.51675655 |
| P62857        | RPS28     | 6+7+8+9             | 0                     | -1.16094985    | 1.16094985              | 9.74E-09 | 2.65E-06   | 123.604597  | 2.23604597 |
| P33151        | CDH5      | 6+7+8+9             | 0                     | -1.04928923    | 1.04928923              | 1.66E-08 | 3.10E-06   | -51.6793835 | 0.48320617 |
| P00491        | PNP       | 6+7+8+9             | 0                     | -5.84523507    | 5.84523507              | 6.87E-08 | 1.10E-05   | -98.2605622 | 0.01739438 |
| P25787        | PSMA2     | 6+7+8+9             | 0                     | -1.71925686    | 1.71925686              | 9.90E-08 | 1.15E-05   | -69.6294879 | 0.30370512 |
| P06727        | APOA4     | 6+7+8+9             | 0                     | -0.85483935    | 0.85483935              | 1.03E-07 | 1.15E-05   | -44.7073106 | 0.5529269  |
| P14209        | CD99      | 6+7+8+9             | 0                     | -1.23124337    | 1.23124337              | 1.66E-07 | 1.40E-05   | -57.4049814 | 0.42595019 |
| P02647        | APOA1     | 6+7+8+9             | 0                     | -1.21375838    | 1.21375838              | 1.72E-07 | 1.40E-05   | -56.8856026 | 0.43114397 |
| P68871        | HBB       | 6+7+8+9             | 0                     | -2.0069697     | 2.0069697               | 2.14E-07 | 1.59E-05   | -75.1204844 | 0.24879516 |
| P27824        | CANX      | 6+7+8+9             | 0                     | -1.04504889    | 1.04504889              | 2.84E-07 | 1.99E-05   | -51.5371514 | 0.48462849 |
| Q8IX30        | SCUBE3    | 6+7+8+9             | 0                     | -1.48501093    | 1.48501093              | 3.09E-07 | 2.03E-05   | -64.2754171 | 0.35724583 |
| P32241        | VIPR1     | 6+7+8+9             | 0                     | -1.45214553    | 1.45214553              | 5.21E-07 | 3.06E-05   | -63.4522507 | 0.36547749 |
| P02812;P04280 | PRB2;PRB1 | 6+7+8+9             | 0                     | -2.99633019    | 2.99633019              | 5.83E-07 | 3.26E-05   | -87.468163  | 0.12531837 |
| P06734        | FCER2     | 6+7+8+9             | 0                     | -0.8338376     | 0.8338376               | 1.14E-06 | 5.78E-05   | -43.896511  | 0.56103489 |
| Q14515        | SPARCL1   | 6+7+8+9             | 0                     | -1.53270244    | 1.53270244              | 1.32E-06 | 6.14E-05   | -65.4370669 | 0.34562933 |
| Q9NZT2        | OGFR      | 6+7+8+9             | 0                     | -7.60567836    | 7.60567836              | 1.38E-06 | 6.18E-05   | -99.486592  | 0.00513408 |
| P08185        | SERPINA6  | 6+7+8+9             | 0                     | -1.02690793    | 1.02690793              | 1.68E-06 | 6.97E-05   | -50.9239149 | 0.49076085 |
| O75110        | ATP9A     | 6+7+8+9             | 0                     | -6.13110181    | 6.13110181              | 1.89E-06 | 7.28E-05   | -98.5732284 | 0.01426772 |
| Q9UI42        | CPA4      | 6+7+8+9             | 0                     | -2.96637122    | 2.96637122              | 2.18E-06 | 7.67E-05   | -87.2052064 | 0.12794794 |
| P05089        | ARG1      | 6+7+8+9             | 0                     | -1.52973689    | 1.52973689              | 2.20E-06 | 7.67E-05   | -65.3659476 | 0.34634052 |
| Q99536        | VAT1      | 6+7+8+9             | 0                     | -0.95081915    | 0.95081915              | 2.88E-06 | 9.46E-05   | -48.266136  | 0.51733864 |
| P50135        | HNMT      | 6+7+8+9             | 0                     | 1.10355        | 1.10355                 | 3.13E-06 | 9.71E-05   | 114.882799  | 2.14882799 |
| O95394        | PGM3      | 6+7+8+9             | 0                     | -1.27632955    | 1.27632955              | 3.83E-06 | 0.00011279 | -58.7155484 | 0.41284452 |
| Q86V85        | GPR180    | 6+7+8+9             | 0                     | -0.99847604    | 0.99847604              | 4.53E-06 | 0.00012822 | -49.9471556 | 0.50052844 |
| P54707        | ATP12A    | 6+7+8+9             | 0                     | -2.43095118    | 2.43095118              | 4.99E-06 | 0.00012899 | -81.4556858 | 0.18544314 |
| P16150        | SPN       | 6+7+8+9             | 0                     | -1.79203531    | 1.79203531              | 5.15E-06 | 0.00012899 | -71.1235622 | 0.28876438 |
| Q9NQ36        | SCUBE2    | 6+7+8+9             | 0                     | -0.9746988     | 0.9746988               | 5.53E-06 | 0.00012899 | -49.1153931 | 0.50884607 |
| Q9BRK3        | MXRA8     | 6+7+8+9             | 0                     | -0.90359458    | 0.90359458              | 5.10E-06 | 0.00012899 | -46.5446808 | 0.53455319 |
| P15559        | NQO1      | 6+7+8+9             | 0                     | 0.83742171     | 0.83742171              | 5.65E-06 | 0.00012899 | 78.6853943  | 1.78685394 |
| Q8IWY4        | SCUBE1    | 6+7+8+9             | 0                     | -1.10874324    | 1.10874324              | 6.06E-06 | 0.00013034 | -53.630221  | 0.46369779 |
| Q8TF66        | LRRCL15   | 6+7+8+9             | 0                     | -0.98337584    | 0.98337584              | 7.13E-06 | 0.00014753 | -49.4205184 | 0.50579482 |
| P23381        | WARS      | 6+7+8+9             | 0                     | -1.31628915    | 1.31628915              | 8.17E-06 | 0.00016612 | -59.8433494 | 0.40156651 |
| P02679        | FGG       | 6+7+8+9             | 0                     | -1.65305877    | 1.65305877              | 1.08E-05 | 0.00021091 | -68.2034702 | 0.3179653  |

|        |           |         |   |             |            |          |            |             |            |
|--------|-----------|---------|---|-------------|------------|----------|------------|-------------|------------|
| P81605 | DCD       | 6+7+8+9 | 0 | -1.91548339 | 1.91548339 | 1.11E-05 | 0.00021309 | -73.4916898 | 0.2650831  |
| Q9BX67 | JAM3      | 6+7+8+9 | 0 | -1.48222358 | 1.48222358 | 1.22E-05 | 0.00022321 | -64.2063291 | 0.35793671 |
| P54727 | RAD23B    | 6+7+8+9 | 0 | -1.4500542  | 1.4500542  | 1.21E-05 | 0.00022321 | -63.3992326 | 0.36600767 |
| P25705 | ATP5F1A   | 6+7+8+9 | 0 | -2.15475799 | 2.15475799 | 1.29E-05 | 0.00022594 | -77.5429238 | 0.22457076 |
| Q96P63 | SERPINB12 | 6+7+8+9 | 0 | -1.65641614 | 1.65641614 | 1.28E-05 | 0.00022594 | -68.2773794 | 0.31722621 |
| P61769 | B2M       | 6+7+8+9 | 0 | -1.39549865 | 1.39549865 | 1.36E-05 | 0.00023317 | -61.9886715 | 0.38011329 |
| Q8N436 | CPXM2     | 6+7+8+9 | 0 | -1.15108069 | 1.15108069 | 1.50E-05 | 0.00025206 | -54.9712195 | 0.45028781 |
| P08118 | MSMB      | 6+7+8+9 | 0 | -0.94577264 | 0.94577264 | 1.66E-05 | 0.00027076 | -48.0848554 | 0.51915145 |
| P13639 | EEF2      | 6+7+8+9 | 0 | -0.82996137 | 0.82996137 | 1.67E-05 | 0.00027076 | -43.7455693 | 0.56254431 |
| P25786 | PSMA1     | 6+7+8+9 | 0 | -1.09179527 | 1.09179527 | 1.83E-05 | 0.00028434 | -53.0822826 | 0.46917718 |
| Q86TD4 | SRL       | 6+7+8+9 | 0 | -1.22234821 | 1.22234821 | 1.92E-05 | 0.00028983 | -57.1415439 | 0.42858456 |
| Q86YZ3 | HRNR      | 6+7+8+9 | 0 | -1.91192005 | 1.91192005 | 1.96E-05 | 0.00029087 | -73.4261356 | 0.26573864 |
| Q15848 | ADIPOQ    | 6+7+8+9 | 0 | -1.14962261 | 1.14962261 | 1.98E-05 | 0.00029087 | -54.9256875 | 0.45074313 |
| Q02985 | CFHR3     | 6+7+8+9 | 0 | -1.36660786 | 1.36660786 | 2.20E-05 | 0.00030408 | -61.2198001 | 0.387802   |
| Q09327 | MGAT3     | 6+7+8+9 | 0 | -1.31248286 | 1.31248286 | 2.23E-05 | 0.00030408 | -59.7372635 | 0.40262737 |
| P02760 | AMBP      | 6+7+8+9 | 0 | -0.99609663 | 0.99609663 | 2.18E-05 | 0.00030408 | -49.8645365 | 0.50135464 |
| O43405 | COCH      | 6+7+8+9 | 0 | -0.85928099 | 0.85928099 | 2.10E-05 | 0.00030408 | -44.8772789 | 0.55122721 |
| Q6P531 | GCT6      | 6+7+8+9 | 0 | -0.85047209 | 0.85047209 | 2.14E-05 | 0.00030408 | -44.5396774 | 0.55460323 |
| Q92817 | EVPL      | 6+7+8+9 | 0 | -1.64710596 | 1.64710596 | 2.43E-05 | 0.00032684 | -68.0720011 | 0.31927999 |
| P11684 | SCGB1A1   | 6+7+8+9 | 0 | -1.41166907 | 1.41166907 | 2.51E-05 | 0.00032976 | -62.412342  | 0.37587658 |
| P35908 | KRT2      | 6+7+8+9 | 0 | -2.17643227 | 2.17643227 | 2.94E-05 | 0.00036484 | -77.8777853 | 0.22122215 |
| P04264 | KRT1      | 6+7+8+9 | 0 | -1.85965396 | 1.85965396 | 3.19E-05 | 0.00038391 | -72.4457639 | 0.27554236 |
| Q9GZP4 | PITHD1    | 6+7+8+9 | 0 | -0.89753866 | 0.89753866 | 3.26E-05 | 0.00038779 | -46.3198228 | 0.53680177 |
| Q9Y4L1 | HYOU1     | 6+7+8+9 | 0 | -1.48442141 | 1.48442141 | 3.37E-05 | 0.00039259 | -64.2608162 | 0.35739184 |
| Q6UXG3 | CD300LG   | 6+7+8+9 | 0 | -0.86340027 | 0.86340027 | 3.36E-05 | 0.00039259 | -45.0344447 | 0.54965555 |
| P30040 | ERP29     | 6+7+8+9 | 0 | -2.08100954 | 2.08100954 | 3.69E-05 | 0.00040875 | -76.3651034 | 0.23634897 |
| P35858 | IGFALS    | 6+7+8+9 | 0 | -1.10019364 | 1.10019364 | 3.61E-05 | 0.00040875 | -53.3546115 | 0.46645389 |
| P07998 | RNASE1    | 6+7+8+9 | 0 | -1.07019143 | 1.07019143 | 3.69E-05 | 0.00040875 | -52.37442   | 0.4762558  |
| O14818 | PSMA7     | 6+7+8+9 | 0 | -1.04721669 | 1.04721669 | 3.69E-05 | 0.00040875 | -51.6099171 | 0.48390083 |
| Q13867 | BLMH      | 6+7+8+9 | 0 | -1.32484256 | 1.32484256 | 3.80E-05 | 0.00041673 | -60.0807245 | 0.39919276 |
| Q9UGM5 | FETUB     | 6+7+8+9 | 0 | -1.12110742 | 1.12110742 | 3.91E-05 | 0.00042395 | -54.0259209 | 0.45974079 |
| Q9BYE2 | TMPRSS13  | 6+7+8+9 | 0 | -2.34152747 | 2.34152747 | 3.98E-05 | 0.00042798 | -80.2698677 | 0.19730132 |
| P43627 | KIR2DL2   | 6+7+8+9 | 0 | -5.15223311 | 5.15223311 | 4.43E-05 | 0.00045971 | -97.1879484 | 0.02812052 |
| P13646 | KRT13     | 6+7+8+9 | 0 | -2.23512572 | 2.23512572 | 4.43E-05 | 0.00045971 | -78.7597261 | 0.21240274 |
| P20333 | TNFRSF1B  | 6+7+8+9 | 0 | -0.85741276 | 0.85741276 | 4.43E-05 | 0.00045971 | -44.8058512 | 0.55194149 |
| P14923 | JUP       | 6+7+8+9 | 0 | -1.84842914 | 1.84842914 | 4.73E-05 | 0.00047593 | -72.2305432 | 0.27769457 |
| Q8NBS9 | TXNDC5    | 6+7+8+9 | 0 | -0.97889418 | 0.97889418 | 4.86E-05 | 0.00048475 | -49.2631513 | 0.50736849 |
| P29401 | TKT       | 6+7+8+9 | 0 | -0.92917959 | 0.92917959 | 5.08E-05 | 0.00050268 | -47.4843105 | 0.5251569  |
| Q08554 | DSC1      | 6+7+8+9 | 0 | -1.82654095 | 1.82654095 | 5.39E-05 | 0.00051965 | -71.8060202 | 0.2819398  |

|                       |                    |         |   |             |            |            |            |             |            |
|-----------------------|--------------------|---------|---|-------------|------------|------------|------------|-------------|------------|
| P13645                | KRT10              | 6+7+8+9 | 0 | -2.31249174 | 2.31249174 | 5.45E-05   | 0.00052052 | -79.8687555 | 0.20131245 |
| Q9Y5Y7                | LYVE1              | 6+7+8+9 | 0 | -0.98126351 | 0.98126351 | 5.98E-05   | 0.00056648 | -49.3464078 | 0.50653592 |
| Q5D862                | FLG2               | 6+7+8+9 | 0 | -2.21421826 | 2.21421826 | 6.19E-05   | 0.00056687 | -78.4496718 | 0.21550328 |
| P04003                | C4BPA              | 6+7+8+9 | 0 | -0.92630135 | 0.92630135 | 6.12E-05   | 0.00056687 | -47.3794346 | 0.52620565 |
| Q6UWH4                | GASK1B             | 6+7+8+9 | 0 | -1.01865594 | 1.01865594 | 6.94E-05   | 0.0006163  | -50.6424032 | 0.49357597 |
| P80723                | BASP1              | 6+7+8+9 | 0 | -0.86833211 | 0.86833211 | 7.28E-05   | 0.00064047 | -45.222023  | 0.54777977 |
| P02533                | KRT14              | 6+7+8+9 | 0 | -1.97213393 | 1.97213393 | 7.64E-05   | 0.00065166 | -74.5124241 | 0.25487576 |
| P33176                | KIF5B              | 6+7+8+9 | 0 | -1.32002342 | 1.32002342 | 8.43E-05   | 0.00069335 | -59.9471564 | 0.40052844 |
| P49913                | CAMP               | 6+7+8+9 | 0 | -0.99729886 | 0.99729886 | 8.61E-05   | 0.00070242 | -49.9062979 | 0.50093702 |
| P62495                | ETF1               | 6+7+8+9 | 0 | -1.31455933 | 1.31455933 | 9.13E-05   | 0.00072402 | -59.7951718 | 0.40204828 |
| Q02413                | DSG1               | 6+7+8+9 | 0 | -0.93102838 | 0.93102838 | 9.85E-05   | 0.00077018 | -47.5515655 | 0.52448435 |
| O60701                | UGDH               | 6+7+8+9 | 0 | -1.22838407 | 1.22838407 | 0.0001113  | 0.00085227 | -57.3204777 | 0.42679522 |
| O00264                | PGRMC1             | 6+7+8+9 | 0 | -1.19816529 | 1.19816529 | 0.00011276 | 0.0008576  | -56.4170817 | 0.43582918 |
| P35030                | PRSS3              | 6+7+8+9 | 0 | -1.58482051 | 1.58482051 | 0.00011569 | 0.00087391 | -66.6633858 | 0.33336614 |
| O95969                | SCGB1D2            | 6+7+8+9 | 0 | -1.27038407 | 1.27038407 | 0.00012896 | 0.00092421 | -58.5450601 | 0.4145494  |
| Q5T749                | KPRP               | 6+7+8+9 | 0 | -1.73114971 | 1.73114971 | 0.00014523 | 0.00102118 | -69.8788181 | 0.30121182 |
| P10645                | CHGA               | 6+7+8+9 | 0 | -0.81972868 | 0.81972868 | 0.00014741 | 0.00103006 | -43.3451521 | 0.56654848 |
| P34913                | EPHX2              | 6+7+8+9 | 0 | -0.98973186 | 0.98973186 | 0.00015017 | 0.00103154 | -49.6428639 | 0.50357136 |
| P07477                | PRSS1              | 6+7+8+9 | 0 | -2.02301678 | 2.02301678 | 0.00015657 | 0.00105932 | -75.3956856 | 0.24604314 |
| P41439                | FOLR3              | 6+7+8+9 | 0 | -1.67410045 | 1.67410045 | 0.00015671 | 0.00105932 | -68.6638564 | 0.31336144 |
| P25311                | AZGP1              | 6+7+8+9 | 0 | -0.80919156 | 0.80919156 | 0.00015729 | 0.00105932 | -42.929843  | 0.57070157 |
| P35527                | KRT9               | 6+7+8+9 | 0 | -1.97020745 | 1.97020745 | 0.0001638  | 0.00107096 | -74.478367  | 0.25521633 |
| O75342                | ALOX12B            | 6+7+8+9 | 0 | -1.12267308 | 1.12267308 | 0.0001691  | 0.00109913 | -54.0757865 | 0.45924214 |
| O43511                | SLC26A4            | 6+7+8+9 | 0 | -1.5155017  | 1.5155017  | 0.00017722 | 0.00113219 | -65.0225189 | 0.34977481 |
| P30408                | TM4SF1             | 6+7+8+9 | 0 | -1.11460924 | 1.11460924 | 0.00018137 | 0.0011521  | -53.8183776 | 0.46181622 |
| O75023                | LILRB5             | 6+7+8+9 | 0 | -0.86590983 | 0.86590983 | 0.00018951 | 0.00119031 | -45.1299737 | 0.54870026 |
| AOA0A0MRZ8;<br>P04433 | IGKV3D-11;IGKV3-11 | 6+7+8+9 | 0 | -0.8408342  | 0.8408342  | 0.00019569 | 0.00121547 | -44.167936  | 0.55832064 |
| P16671                | CD36               | 6+7+8+9 | 0 | -3.41845728 | 3.41845728 | 0.00019834 | 0.00121707 | -90.6471963 | 0.09352804 |
| P55017                | SLC12A3            | 6+7+8+9 | 0 | -3.04336872 | 3.04336872 | 0.00019922 | 0.00121707 | -87.8701696 | 0.1212983  |
| P69905                | HBA1               | 6+7+8+9 | 0 | -1.26523929 | 1.26523929 | 0.00019738 | 0.00121707 | -58.3969643 | 0.41603036 |
| P22735                | TGM1               | 6+7+8+9 | 0 | -1.55645984 | 1.55645984 | 0.00021327 | 0.00128886 | -66.0015671 | 0.33998433 |
| P01023                | A2M                | 6+7+8+9 | 0 | -1.02071889 | 1.02071889 | 0.00022    | 0.00131528 | -50.7129305 | 0.4928707  |
| P43626                | KIR2DL1            | 6+7+8+9 | 0 | -1.07365414 | 1.07365414 | 0.00022192 | 0.00131972 | -52.4885923 | 0.47511408 |
| Q8NBJ7                | SUMF2              | 6+7+8+9 | 0 | -0.98286778 | 0.98286778 | 0.00022681 | 0.00133924 | -49.402703  | 0.50597297 |
| Q8N335                | GPD1L              | 6+7+8+9 | 0 | -0.84215912 | 0.84215912 | 0.0002276  | 0.00133924 | -44.2191863 | 0.55780814 |
| P21453                | S1PR1              | 6+7+8+9 | 0 | -1.00071781 | 1.00071781 | 0.00023062 | 0.00134993 | -50.0248713 | 0.49975129 |
| Q9HB21                | PLEKHA1            | 6+7+8+9 | 0 | 1.09912799  | 1.09912799 | 0.0002326  | 0.00135369 | 114.225168  | 2.14225168 |
| P49720                | PSMB3              | 6+7+8+9 | 0 | -2.41355324 | 2.41355324 | 0.00023985 | 0.00136116 | -81.2306999 | 0.187693   |

|                                    |                                                   |         |   |             |            |            |            |             |            |
|------------------------------------|---------------------------------------------------|---------|---|-------------|------------|------------|------------|-------------|------------|
| O95865                             | DDAH2                                             | 6+7+8+9 | 0 | -0.91765417 | 0.91765417 | 0.00026104 | 0.00144478 | -47.0630923 | 0.52936908 |
| Q92823                             | NRCAM                                             | 6+7+8+9 | 0 | -2.71252257 | 2.71252257 | 0.00029226 | 0.00159386 | -84.7436957 | 0.15256304 |
| P02810                             | PRH1                                              | 6+7+8+9 | 0 | -2.93119914 | 2.93119914 | 0.00029954 | 0.00161778 | -86.8894432 | 0.13110557 |
| P31939                             | ATIC                                              | 6+7+8+9 | 0 | -1.55583623 | 1.55583623 | 0.00030375 | 0.00162484 | -65.9868679 | 0.34013132 |
| Q96NZ9                             | PRAP1                                             | 6+7+8+9 | 0 | -1.74854284 | 1.74854284 | 0.00031075 | 0.00163876 | -70.2397786 | 0.29760221 |
| Q15485                             | FCN2                                              | 6+7+8+9 | 0 | -0.95935031 | 0.95935031 | 0.00031028 | 0.00163876 | -48.5711539 | 0.51428846 |
| Q9BQI0                             | AIF1L                                             | 6+7+8+9 | 0 | 0.98298209  | 0.98298209 | 0.00031638 | 0.00165209 | 97.6546766  | 1.97654677 |
| Q7Z794                             | KRT77                                             | 6+7+8+9 | 0 | -1.67897499 | 1.67897499 | 0.00034119 | 0.00171051 | -68.7695554 | 0.31230445 |
| P02747                             | C1QC                                              | 6+7+8+9 | 0 | -1.47101492 | 1.47101492 | 0.00033934 | 0.00171051 | -63.9271558 | 0.36072844 |
| P06899;P23527;P33778;Q16778;Q8N257 | HIST1H2BJ;HIST1H2BO;HIST1H2BB;HIST2H2BE;HIST3H2BB | 6+7+8+9 | 0 | -0.91646459 | 0.91646459 | 0.00035537 | 0.00177366 | -47.0194247 | 0.52980575 |
| P13647                             | KRT5                                              | 6+7+8+9 | 0 | -1.77409114 | 1.77409114 | 0.00036104 | 0.00179399 | -70.7621556 | 0.29237844 |
| P60983                             | GMFB                                              | 6+7+8+9 | 0 | -0.95674926 | 0.95674926 | 0.00036562 | 0.00180869 | -48.4783488 | 0.51521651 |
| Q13261                             | IL15RA                                            | 6+7+8+9 | 0 | -1.00819655 | 1.00819655 | 0.00041316 | 0.00199099 | -50.2832653 | 0.49716735 |
| Q99733                             | NAP1L4                                            | 6+7+8+9 | 0 | 1.03375875  | 1.03375875 | 0.0004271  | 0.00204057 | 104.735141  | 2.04735141 |
| Q57750                             | XP32                                              | 6+7+8+9 | 0 | -1.47473472 | 1.47473472 | 0.00044592 | 0.00211245 | -64.0200453 | 0.35979955 |
| P60900                             | PSMA6                                             | 6+7+8+9 | 0 | -0.98181219 | 0.98181219 | 0.00044918 | 0.00211889 | -49.3656684 | 0.50634332 |
| Q7Z2H8                             | SLC36A1                                           | 6+7+8+9 | 0 | -0.86113919 | 0.86113919 | 0.00045519 | 0.00213825 | -44.9482317 | 0.55051768 |
| P51858                             | HDGF                                              | 6+7+8+9 | 0 | -1.01236572 | 1.01236572 | 0.00046202 | 0.00216125 | -50.4267317 | 0.49573268 |
| P10163                             | PRB4                                              | 6+7+8+9 | 0 | -5.8685724  | 5.8685724  | 0.00047748 | 0.00221503 | -98.2884733 | 0.01711527 |
| Q96QK1                             | VPS35                                             | 6+7+8+9 | 0 | -1.09779041 | 1.09779041 | 0.00048528 | 0.00223268 | -53.2768452 | 0.46723155 |
| P48740                             | MASP1                                             | 6+7+8+9 | 0 | -1.41131062 | 1.41131062 | 0.00052625 | 0.00234403 | -62.4030018 | 0.37596998 |
| Q8NCH0                             | CHST14                                            | 6+7+8+9 | 0 | 2.58509096  | 2.58509096 | 0.00054309 | 0.00240941 | 500.053426  | 6.00053426 |
| Q9ULV0                             | MYO5B                                             | 6+7+8+9 | 0 | -3.85918515 | 3.85918515 | 0.000572   | 0.00248185 | -93.1092021 | 0.06890798 |
| P02538                             | KRT6A                                             | 6+7+8+9 | 0 | -1.93468077 | 1.93468077 | 0.00057295 | 0.00248185 | -73.8420891 | 0.26157911 |
| P12830                             | CDH1                                              | 6+7+8+9 | 0 | -1.35472552 | 1.35472552 | 0.0005794  | 0.00248185 | -60.8990793 | 0.39100921 |
| O00461                             | GOLIM4                                            | 6+7+8+9 | 0 | -0.81341637 | 0.81341637 | 0.00057831 | 0.00248185 | -43.0967233 | 0.56903277 |
| Q06323                             | PSME1                                             | 6+7+8+9 | 0 | -4.53991194 | 4.53991194 | 0.00060421 | 0.00256468 | -95.7011694 | 0.04298831 |
| Q9UKZ9                             | PCOLCE2                                           | 6+7+8+9 | 0 | -0.85469005 | 0.85469005 | 0.00064322 | 0.00270346 | -44.7015881 | 0.55298412 |
| P08F94                             | PKHD1                                             | 6+7+8+9 | 0 | -1.19734624 | 1.19734624 | 0.0006527  | 0.00270364 | -56.3923315 | 0.43607669 |
| P19801                             | AOC1                                              | 6+7+8+9 | 0 | -1.16509464 | 1.16509464 | 0.00064868 | 0.00270364 | -55.4064995 | 0.44593501 |
| P62906                             | RPL10A                                            | 6+7+8+9 | 0 | -4.7822941  | 4.7822941  | 0.00065685 | 0.00270979 | -96.3659908 | 0.03634009 |
| Q6UWR7                             | ENPP6                                             | 6+7+8+9 | 0 | -1.46997932 | 1.46997932 | 0.00066085 | 0.00271453 | -63.9012525 | 0.36098748 |
| Q9Y5X3                             | SNX5                                              | 6+7+8+9 | 0 | -1.97531116 | 1.97531116 | 0.00067436 | 0.00274156 | -74.5684934 | 0.25431507 |
| P22532;P35325                      | SPRR2D;SPRR2B                                     | 6+7+8+9 | 0 | -0.89269124 | 0.89269124 | 0.00068358 | 0.00275899 | -46.1391554 | 0.53860845 |
| P49411                             | TUFM                                              | 6+7+8+9 | 0 | 2.95181718  | 2.95181718 | 0.00068747 | 0.00276098 | 673.723012  | 7.73723012 |
| Q14210                             | LY6D                                              | 6+7+8+9 | 0 | -1.23597938 | 1.23597938 | 0.00068901 | 0.00276098 | -57.5445808 | 0.42455419 |
| P08779                             | KRT16                                             | 6+7+8+9 | 0 | -1.41201644 | 1.41201644 | 0.00070929 | 0.00283209 | -62.4213914 | 0.37578609 |

|                       |                    |         |   |             |            |            |            |             |            |
|-----------------------|--------------------|---------|---|-------------|------------|------------|------------|-------------|------------|
| Q15828                | CST6               | 6+7+8+9 | 0 | -1.04962699 | 1.04962699 | 0.00071227 | 0.00283388 | -51.6906947 | 0.48309305 |
| P05109                | S100A8             | 6+7+8+9 | 0 | -1.10287027 | 1.10287027 | 0.00071995 | 0.00285428 | -53.4410726 | 0.46558927 |
| P47972                | NPTX2              | 6+7+8+9 | 0 | -0.98097598 | 0.98097598 | 0.00074232 | 0.00291199 | -49.3363115 | 0.50663689 |
| Q9UHC6                | CNTNAP2            | 6+7+8+9 | 0 | -1.10381795 | 1.10381795 | 0.00075877 | 0.00295576 | -53.4716461 | 0.46528354 |
| P12319                | FCER1A             | 6+7+8+9 | 0 | -0.9356869  | 0.9356869  | 0.00078269 | 0.00303836 | -47.7206502 | 0.5227935  |
| P09564                | CD7                | 6+7+8+9 | 0 | -0.92535995 | 0.92535995 | 0.00081861 | 0.00312378 | -47.3450871 | 0.52654913 |
| P31151                | S100A7             | 6+7+8+9 | 0 | -2.06173409 | 2.06173409 | 0.00087037 | 0.00327635 | -76.047205  | 0.23952795 |
| P35270                | SPR                | 6+7+8+9 | 0 | -2.80069288 | 2.80069288 | 0.00088488 | 0.00328671 | -85.6481649 | 0.14351835 |
| P15924                | DSP                | 6+7+8+9 | 0 | -1.79799221 | 1.79799221 | 0.00088254 | 0.00328671 | -71.2425474 | 0.28757453 |
| P49447                | CYB561             | 6+7+8+9 | 0 | -0.84645861 | 0.84645861 | 0.00090294 | 0.00330981 | -44.3851758 | 0.55614824 |
| P07237                | P4HB               | 6+7+8+9 | 0 | -6.76524904 | 6.76524904 | 0.00093639 | 0.00337889 | -99.0807003 | 0.009193   |
| O15511                | ARPC5              | 6+7+8+9 | 0 | -0.86435756 | 0.86435756 | 0.00093689 | 0.00337889 | -45.0709046 | 0.54929095 |
| Q7Z3Y8                | KRT27              | 6+7+8+9 | 0 | -2.65688635 | 2.65688635 | 0.00095537 | 0.0034234  | -84.1438585 | 0.15856142 |
| P00915                | CA1                | 6+7+8+9 | 0 | -1.36600569 | 1.36600569 | 0.00096952 | 0.00345197 | -61.2036103 | 0.3879639  |
| Q9NZT1                | CALML5             | 6+7+8+9 | 0 | -1.31549423 | 1.31549423 | 0.00099266 | 0.00347896 | -59.821217  | 0.40178783 |
| P08174                | CD55               | 6+7+8+9 | 0 | -0.81175972 | 0.81175972 | 0.00098167 | 0.00347896 | -43.0313437 | 0.56968656 |
| Q9H4G4                | GLIPR2             | 6+7+8+9 | 0 | -0.93920324 | 0.93920324 | 0.00101774 | 0.00353366 | -47.8479177 | 0.52152082 |
| AOA075B6P5;<br>P01615 | IGKV2-28;IGKV2D-28 | 6+7+8+9 | 0 | -1.01998307 | 1.01998307 | 0.00102504 | 0.00354797 | -50.6877861 | 0.49312214 |
| Q9HCY8                | S100A14            | 6+7+8+9 | 0 | -1.05146546 | 1.05146546 | 0.00106668 | 0.00362476 | -51.7522175 | 0.48247783 |
| Q14247                | CTTN               | 6+7+8+9 | 0 | -0.86078258 | 0.86078258 | 0.0010724  | 0.00363315 | -44.9346223 | 0.55065378 |
| P48304                | REG1B              | 6+7+8+9 | 0 | -1.5158428  | 1.5158428  | 0.00109906 | 0.00367887 | -65.0307877 | 0.34969212 |
| Q5JTV8                | TOR1AIP1           | 6+7+8+9 | 0 | -1.45533806 | 1.45533806 | 0.00110856 | 0.0036886  | -63.5330375 | 0.36466963 |
| P10644                | PRKAR1A            | 6+7+8+9 | 0 | -2.01521865 | 2.01521865 | 0.00111397 | 0.00369559 | -75.2623331 | 0.24737667 |
| P02814                | SMR3B              | 6+7+8+9 | 0 | -2.25954473 | 2.25954473 | 0.00113025 | 0.00372751 | -79.1162128 | 0.20883787 |
| P55283                | CDH4               | 6+7+8+9 | 0 | 1.29244267  | 1.29244267 | 0.00120313 | 0.00387636 | 144.942424  | 2.44942424 |
| P50443                | SLC26A2            | 6+7+8+9 | 0 | -1.35952922 | 1.35952922 | 0.00122267 | 0.0039254  | -61.0290561 | 0.38970944 |
| Q9Y561                | LRP12              | 6+7+8+9 | 0 | -1.93383362 | 1.93383362 | 0.00127864 | 0.00405466 | -73.8267247 | 0.26173275 |
| P42892                | ECE1               | 6+7+8+9 | 0 | -1.85052174 | 1.85052174 | 0.00129305 | 0.00407528 | -72.2707931 | 0.27729207 |
| P28066                | PSMA5              | 6+7+8+9 | 0 | -0.81173841 | 0.81173841 | 0.00129403 | 0.00407528 | -43.0305024 | 0.56969498 |
| P43686                | PSMC4              | 6+7+8+9 | 0 | -3.2900349  | 3.2900349  | 0.0013456  | 0.00421396 | -89.7764716 | 0.10223528 |
| P35240                | NF2                | 6+7+8+9 | 0 | 1.33961725  | 1.33961725 | 0.00140067 | 0.00436198 | 153.084165  | 2.53084165 |
| P19013                | KRT4               | 6+7+8+9 | 0 | -2.25687256 | 2.25687256 | 0.00141631 | 0.00437414 | -79.0774958 | 0.20922504 |
| P29966                | MARCKS             | 6+7+8+9 | 0 | -0.88479746 | 0.88479746 | 0.00142921 | 0.00438571 | -45.8436454 | 0.54156355 |
| P53004                | BLVRA              | 6+7+8+9 | 0 | -3.21105635 | 3.21105635 | 0.00144016 | 0.00438718 | -89.2011945 | 0.10798806 |
| P00492                | HPRT1              | 6+7+8+9 | 0 | -0.81904503 | 0.81904503 | 0.00145182 | 0.00439874 | -43.3182986 | 0.56681701 |
| P02042                | HBD                | 6+7+8+9 | 0 | -2.63780045 | 2.63780045 | 0.00147212 | 0.00444819 | -83.9326986 | 0.16067301 |
| Q9HC84                | MUC5B              | 6+7+8+9 | 0 | -2.3909768  | 2.3909768  | 0.00148474 | 0.00447424 | -80.9346728 | 0.19065327 |
| P25789                | PSMA4              | 6+7+8+9 | 0 | -1.25192473 | 1.25192473 | 0.00162199 | 0.00476423 | -58.0112348 | 0.41988765 |

|                                                                                                                                  |                                                                                                                                                                 |         |   |             |            |            |            |             |            |
|----------------------------------------------------------------------------------------------------------------------------------|-----------------------------------------------------------------------------------------------------------------------------------------------------------------|---------|---|-------------|------------|------------|------------|-------------|------------|
| P28906                                                                                                                           | CD34                                                                                                                                                            | 6+7+8+9 | 0 | -1.00150229 | 1.00150229 | 0.00163333 | 0.00476423 | -50.0520382 | 0.49947962 |
| P80511                                                                                                                           | S100A12                                                                                                                                                         | 6+7+8+9 | 0 | -1.19678009 | 1.19678009 | 0.00166839 | 0.00480738 | -56.3752154 | 0.43624785 |
| P02730                                                                                                                           | SLC4A1                                                                                                                                                          | 6+7+8+9 | 0 | -0.83736486 | 0.83736486 | 0.00166084 | 0.00480738 | -44.0335114 | 0.55966489 |
| Q8IUE6                                                                                                                           | HIST2H2AB                                                                                                                                                       | 6+7+8+9 | 0 | -2.34981322 | 2.34981322 | 0.00169864 | 0.00488194 | -80.382858  | 0.19617142 |
| Q9BWD1                                                                                                                           | ACAT2                                                                                                                                                           | 6+7+8+9 | 0 | -1.75792858 | 1.75792858 | 0.00172714 | 0.00493848 | -70.4327613 | 0.29567239 |
| P20472                                                                                                                           | PVALB                                                                                                                                                           | 6+7+8+9 | 0 | 1.03449617  | 1.03449617 | 0.0017449  | 0.00496387 | 104.839816  | 2.04839816 |
| A6NCW0;A8MUK1;<br>C9J2P7;C9JJH3;C9JL<br>J4;C9JPN9;C9JVI0;D<br>6R901;D6R9N7;D6<br>RA61;D6RBQ6;D6R<br>CP7;D6RJB6;Q0WX<br>57;Q7RTZ2 | USP17L3;USP17L5;US<br>P17L15;USP17L10;US<br>P17L13;USP17L12;US<br>P17L11;USP17L21;US<br>P17L18;USP17L22;US<br>P17L17;USP17L19;US<br>P17L20;USP17L24;US<br>P17L1 | 6+7+8+9 | 0 | -1.63346493 | 1.63346493 | 0.0018312  | 0.0050801  | -67.7686825 | 0.32231318 |
| O00244                                                                                                                           | ATOX1                                                                                                                                                           | 6+7+8+9 | 0 | -1.24094454 | 1.24094454 | 0.00182277 | 0.0050801  | -57.6904436 | 0.42309556 |
| P11216                                                                                                                           | PYGB                                                                                                                                                            | 6+7+8+9 | 0 | -0.85389015 | 0.85389015 | 0.00182069 | 0.0050801  | -44.6709197 | 0.5532908  |
| P07359                                                                                                                           | GP1BA                                                                                                                                                           | 6+7+8+9 | 0 | -1.02010507 | 1.02010507 | 0.00184035 | 0.00509285 | -50.691956  | 0.49308044 |
| P05198                                                                                                                           | EIF2S1                                                                                                                                                          | 6+7+8+9 | 0 | -6.01356735 | 6.01356735 | 0.00213343 | 0.00555986 | -98.4521251 | 0.01547875 |
| Q99747                                                                                                                           | NAPG                                                                                                                                                            | 6+7+8+9 | 0 | -0.98088768 | 0.98088768 | 0.0021909  | 0.00569635 | -49.3332104 | 0.5066679  |
| Q15631                                                                                                                           | TSN                                                                                                                                                             | 6+7+8+9 | 0 | -1.30037203 | 1.30037203 | 0.00222835 | 0.00578026 | -59.3978517 | 0.40602148 |
| Q9NT68;Q9P273                                                                                                                    | TENM2;TENM3                                                                                                                                                     | 6+7+8+9 | 0 | -1.62387728 | 1.62387728 | 0.0023173  | 0.00598323 | -67.5537709 | 0.32446229 |
| P30453                                                                                                                           | HLA-A                                                                                                                                                           | 6+7+8+9 | 0 | -0.88464944 | 0.88464944 | 0.00238784 | 0.00612923 | -45.8380886 | 0.54161911 |
| P50995                                                                                                                           | ANXA11                                                                                                                                                          | 6+7+8+9 | 0 | -0.91795398 | 0.91795398 | 0.00252997 | 0.00642843 | -47.0740922 | 0.52925908 |
| P25788                                                                                                                           | PSMA3                                                                                                                                                           | 6+7+8+9 | 0 | -1.3732171  | 1.3732171  | 0.00275091 | 0.00685607 | -61.3970527 | 0.38602947 |
| Q687X5                                                                                                                           | STEAP4                                                                                                                                                          | 6+7+8+9 | 0 | -0.97841271 | 0.97841271 | 0.00275109 | 0.00685607 | -49.2462161 | 0.50753784 |
| Q6ISS4                                                                                                                           | LAIR2                                                                                                                                                           | 6+7+8+9 | 0 | -0.81565244 | 0.81565244 | 0.00275727 | 0.00685607 | -43.184851  | 0.56815149 |
| O95436                                                                                                                           | SLC34A2                                                                                                                                                         | 6+7+8+9 | 0 | 6.98824302  | 6.98824302 | 0.00286059 | 0.00705323 | 12596.1126  | 126.961126 |
| P29508                                                                                                                           | SERPINB3                                                                                                                                                        | 6+7+8+9 | 0 | -1.9075516  | 1.9075516  | 0.00285159 | 0.00705323 | -73.3455485 | 0.26654452 |
| P61313                                                                                                                           | RPL15                                                                                                                                                           | 6+7+8+9 | 0 | -0.9840396  | 0.9840396  | 0.0029158  | 0.00713319 | -49.4437837 | 0.50556216 |
| Q9UL46                                                                                                                           | PSME2                                                                                                                                                           | 6+7+8+9 | 0 | -1.09241324 | 1.09241324 | 0.0029925  | 0.00725731 | -53.1023752 | 0.46897625 |
| O60883                                                                                                                           | GPR37L1                                                                                                                                                         | 6+7+8+9 | 0 | -2.44310938 | 2.44310938 | 0.00305544 | 0.00737377 | -81.6113098 | 0.1838869  |
| Q9UBQ7                                                                                                                           | GRHPR                                                                                                                                                           | 6+7+8+9 | 0 | -0.87947036 | 0.87947036 | 0.00311586 | 0.00747539 | -45.6433052 | 0.54356695 |
| P21730                                                                                                                           | C5AR1                                                                                                                                                           | 6+7+8+9 | 0 | -1.08436852 | 1.08436852 | 0.00321225 | 0.00765735 | -52.8401354 | 0.47159865 |
| P47929                                                                                                                           | LGALS7                                                                                                                                                          | 6+7+8+9 | 0 | -0.88738616 | 0.88738616 | 0.00328569 | 0.00779916 | -45.9407335 | 0.54059267 |
| Q04695                                                                                                                           | KRT17                                                                                                                                                           | 6+7+8+9 | 0 | -1.01664177 | 1.01664177 | 0.00339194 | 0.00800039 | -50.5734461 | 0.49426554 |
| Q6ZP82                                                                                                                           | CCDC141                                                                                                                                                         | 6+7+8+9 | 0 | -2.58669029 | 2.58669029 | 0.00347774 | 0.00818549 | -83.3532816 | 0.16646718 |
| Q96MG2                                                                                                                           | JSRP1                                                                                                                                                           | 6+7+8+9 | 0 | -0.82198656 | 0.82198656 | 0.00354925 | 0.00833626 | -43.4337498 | 0.5656625  |
| POCG47;POCG48;P6<br>2979;P62987                                                                                                  | UBB;UBC;RPS27A;UB<br>A52                                                                                                                                        | 6+7+8+9 | 0 | -1.13255735 | 1.13255735 | 0.00361533 | 0.00843828 | -54.3893494 | 0.45610651 |

|               |              |         |   |             |            |            |            |             |            |
|---------------|--------------|---------|---|-------------|------------|------------|------------|-------------|------------|
| O00231        | PSMD11       | 6+7+8+9 | 0 | 2.1270844   | 2.1270844  | 0.00365111 | 0.00847755 | 336.833773  | 4.36833773 |
| Q15262        | PTPRK        | 6+7+8+9 | 0 | -1.96060581 | 1.96060581 | 0.00369996 | 0.00855584 | -74.307945  | 0.25692055 |
| P40227        | CCT6A        | 6+7+8+9 | 0 | -1.72832732 | 1.72832732 | 0.00375559 | 0.00862414 | -69.8198333 | 0.30180167 |
| P05534        | HLA-A        | 6+7+8+9 | 0 | -1.05442079 | 1.05442079 | 0.00377648 | 0.00862414 | -51.8509508 | 0.48149049 |
| Q8N9U0        | TC2N         | 6+7+8+9 | 0 | -0.82431825 | 0.82431825 | 0.00377981 | 0.00862414 | -43.5250985 | 0.56474902 |
| P09488        | GSTM1        | 6+7+8+9 | 0 | -1.01235749 | 1.01235749 | 0.00389343 | 0.00881144 | -50.4264488 | 0.49573551 |
| O60449        | LY75         | 6+7+8+9 | 0 | -0.9575473  | 0.9575473  | 0.0038865  | 0.00881144 | -48.5068403 | 0.5149316  |
| Q14152        | EIF3A        | 6+7+8+9 | 0 | 3.29987016  | 3.29987016 | 0.00393467 | 0.00886887 | 884.826893  | 9.84826893 |
| P23490        | LOR          | 6+7+8+9 | 0 | -1.61750703 | 1.61750703 | 0.00400974 | 0.00901991 | -67.4101873 | 0.32589813 |
| Q12905        | ILF2         | 6+7+8+9 | 0 | 1.12790172  | 1.12790172 | 0.00413258 | 0.00924045 | 118.54066   | 2.1854066  |
| P05186        | ALPL         | 6+7+8+9 | 0 | -1.4391791  | 1.4391791  | 0.00419822 | 0.00934983 | -63.1222919 | 0.36877708 |
| P48552        | NRIP1        | 6+7+8+9 | 0 | -1.18135763 | 1.18135763 | 0.00440897 | 0.00976085 | -55.9063635 | 0.44093637 |
| P29034        | S100A2       | 6+7+8+9 | 0 | -1.61207818 | 1.61207818 | 0.00458473 | 0.01009001 | -67.2873209 | 0.32712679 |
| Q9BYG5        | PARD6B       | 6+7+8+9 | 0 | 2.83884051  | 2.83884051 | 0.00481869 | 0.01038014 | 615.444824  | 7.15444824 |
| Q86UX2        | ITIH5        | 6+7+8+9 | 0 | -1.13852729 | 1.13852729 | 0.00483668 | 0.01039887 | -54.5776985 | 0.45422302 |
| P41227        | NAA10        | 6+7+8+9 | 0 | -1.59735144 | 1.59735144 | 0.00494842 | 0.01059718 | -66.9516864 | 0.33048314 |
| Q9UKX2        | MYH2         | 6+7+8+9 | 0 | -5.46850721 | 5.46850721 | 0.00499698 | 0.01064118 | -97.741525  | 0.02258475 |
| P15309        | ACPP         | 6+7+8+9 | 0 | -1.15766662 | 1.15766662 | 0.00507491 | 0.01076613 | -55.1763083 | 0.44823692 |
| P20774        | OGN          | 6+7+8+9 | 0 | -0.95485303 | 0.95485303 | 0.00507158 | 0.01076613 | -48.4105858 | 0.51589414 |
| P17612        | PRKACA       | 6+7+8+9 | 0 | -1.34860171 | 1.34860171 | 0.00530959 | 0.01113718 | -60.7327549 | 0.39267245 |
| P07203        | GPX1         | 6+7+8+9 | 0 | -4.00509979 | 4.00509979 | 0.00537848 | 0.01123951 | -93.7720542 | 0.06227946 |
| P26012        | ITGB8        | 6+7+8+9 | 0 | -3.32399974 | 3.32399974 | 0.00539596 | 0.01125192 | -90.0143492 | 0.09985651 |
| A0A0A0MT36    | IGKV6D-21    | 6+7+8+9 | 0 | -2.33705726 | 2.33705726 | 0.00550771 | 0.0114454  | -80.2086389 | 0.19791361 |
| Q9BYF1        | ACE2         | 6+7+8+9 | 0 | -4.86100922 | 4.86100922 | 0.00551984 | 0.01144932 | -96.5589545 | 0.03441046 |
| P52209        | PGD          | 6+7+8+9 | 0 | -0.97437985 | 0.97437985 | 0.00567213 | 0.01165705 | -49.1041423 | 0.50895858 |
| Q9NR45        | NANS         | 6+7+8+9 | 0 | -0.9938014  | 0.9938014  | 0.0057164  | 0.01170786 | -49.7847108 | 0.50215289 |
| Q13316        | DMP1         | 6+7+8+9 | 0 | -0.9650228  | 0.9650228  | 0.00571779 | 0.01170786 | -48.7729684 | 0.51227032 |
| P12532;P17540 | CKMT1A;CKMT2 | 6+7+8+9 | 0 | -1.15023801 | 1.15023801 | 0.0058776  | 0.0119206  | -54.9449106 | 0.45055089 |
| P34741        | SDC2         | 6+7+8+9 | 0 | -1.42293788 | 1.42293788 | 0.00647108 | 0.01276181 | -62.7047935 | 0.37295207 |
| P01715        | IGLV3-1      | 6+7+8+9 | 0 | -1.07210017 | 1.07210017 | 0.00673729 | 0.01314536 | -52.4373887 | 0.47562611 |
| P04259        | KRT6B        | 6+7+8+9 | 0 | -1.68256622 | 1.68256622 | 0.0068105  | 0.01326506 | -68.8471992 | 0.31152801 |
| Q13530        | SERINC3      | 6+7+8+9 | 0 | -1.79442185 | 1.79442185 | 0.0068739  | 0.01334204 | -71.1712908 | 0.28828709 |
| Q8N4F0        | BPIFB2       | 6+7+8+9 | 0 | -2.20332406 | 2.20332406 | 0.00712386 | 0.01370821 | -78.2863232 | 0.21713677 |
| Q9BSE5        | AGMAT        | 6+7+8+9 | 0 | 1.95194218  | 1.95194218 | 0.00728615 | 0.01399642 | 286.895026  | 3.86895026 |
| Q9Y6U3        | SCIN         | 6+7+8+9 | 0 | -1.04160738 | 1.04160738 | 0.007432   | 0.01422769 | -51.4214068 | 0.48578593 |
| Q86UN2        | RTN4RL1      | 6+7+8+9 | 0 | -1.56129316 | 1.56129316 | 0.00758261 | 0.01444184 | -66.115278  | 0.33884722 |
| Q6UXF1        | TMEM108      | 6+7+8+9 | 0 | -0.93372486 | 0.93372486 | 0.00790089 | 0.01494618 | -47.6495029 | 0.52350497 |
| Q53TN4        | CYBRD1       | 6+7+8+9 | 0 | -0.9481291  | 0.9481291  | 0.00817877 | 0.01521287 | -48.1695831 | 0.51830417 |
| P06310        | IGKV2-30     | 6+7+8+9 | 0 | -1.03902765 | 1.03902765 | 0.00837526 | 0.01538905 | -51.3344641 | 0.48665536 |



|            |           |         |   |             |            |            |            |             |            |
|------------|-----------|---------|---|-------------|------------|------------|------------|-------------|------------|
| P07288     | KLK3      | 6+7+8+9 | 0 | -0.81778252 | 0.81778252 | 0.00838152 | 0.01538905 | -43.2686743 | 0.56731326 |
| P23458     | JAK1      | 6+7+8+9 | 0 | -1.71569155 | 1.71569155 | 0.0084571  | 0.01550007 | -69.5543409 | 0.30445659 |
| Q9BRF8     | CPPED1    | 6+7+8+9 | 0 | -0.95745709 | 0.95745709 | 0.0087151  | 0.01586887 | -48.5036206 | 0.51496379 |
| P02746     | C1QB      | 6+7+8+9 | 0 | -0.87515894 | 0.87515894 | 0.00882305 | 0.0160393  | -45.4806201 | 0.5451938  |
| P04040     | CAT       | 6+7+8+9 | 0 | -1.0907538  | 1.0907538  | 0.00911086 | 0.01648211 | -53.0484008 | 0.46951599 |
| Q9UNW1     | MINPP1    | 6+7+8+9 | 0 | -0.9041945  | 0.9041945  | 0.00930143 | 0.01677258 | -46.5669047 | 0.53433095 |
| Q96TA1     | FAM129B   | 6+7+8+9 | 0 | -2.00233132 | 2.00233132 | 0.00971436 | 0.01732161 | -75.0403661 | 0.24959634 |
| Q9Y2J2     | EPB41L3   | 6+7+8+9 | 0 | -1.01233919 | 1.01233919 | 0.01008771 | 0.01782482 | -50.42582   | 0.4957418  |
| P04114     | APOB      | 6+7+8+9 | 0 | -2.49068253 | 2.49068253 | 0.01014054 | 0.01782566 | -82.207792  | 0.17792208 |
| O95971     | CD160     | 6+7+8+9 | 0 | -1.10596229 | 1.10596229 | 0.01013542 | 0.01782566 | -53.540752  | 0.46459248 |
| P00505     | GOT2      | 6+7+8+9 | 0 | 0.83796762  | 0.83796762 | 0.01012516 | 0.01782566 | 78.7530209  | 1.78753021 |
| Q8IVY1     | C1orf210  | 6+7+8+9 | 0 | 1.78351294  | 1.78351294 | 0.01035733 | 0.01809296 | 244.26343   | 3.4426343  |
| Q96H20     | SNF8      | 6+7+8+9 | 0 | -3.90891528 | 3.90891528 | 0.01057486 | 0.01830138 | -93.3426828 | 0.06657317 |
| Q14112     | NID2      | 6+7+8+9 | 0 | -0.85377705 | 0.85377705 | 0.01111065 | 0.01884933 | -44.6665818 | 0.55333418 |
| P78371     | CCT2      | 6+7+8+9 | 0 | -2.17057669 | 2.17057669 | 0.01121512 | 0.01894033 | -77.7878136 | 0.22212186 |
| P29373     | CRABP2    | 6+7+8+9 | 0 | -1.48610536 | 1.48610536 | 0.01143206 | 0.01921961 | -64.3025075 | 0.35697493 |
| P38646     | HSPA9     | 6+7+8+9 | 0 | -2.37861916 | 2.37861916 | 0.01159557 | 0.01929645 | -80.7706641 | 0.19229336 |
| P08476     | INHBA     | 6+7+8+9 | 0 | 1.49880754  | 1.49880754 | 0.01164162 | 0.01933928 | 182.609024  | 2.82609024 |
| P00451     | F8        | 6+7+8+9 | 0 | -3.92514001 | 3.92514001 | 0.01189044 | 0.01963591 | -93.4171324 | 0.06582868 |
| P84098     | RPL19     | 6+7+8+9 | 0 | -1.64022564 | 1.64022564 | 0.01249074 | 0.02033502 | -67.9193703 | 0.3208063  |
| P22626     | HNRNPA2B1 | 6+7+8+9 | 0 | -2.25098276 | 2.25098276 | 0.01253523 | 0.02036975 | -78.9919052 | 0.21008095 |
| A0A075B6H9 | IGLV4-69  | 6+7+8+9 | 0 | -1.02040214 | 1.02040214 | 0.01259272 | 0.02043347 | -50.7021082 | 0.49297892 |
| P43490     | NAMPT     | 6+7+8+9 | 0 | -1.09428553 | 1.09428553 | 0.01328552 | 0.0213102  | -53.1631983 | 0.46836802 |
| Q99102     | MUC4      | 6+7+8+9 | 0 | -0.8174897  | 0.8174897  | 0.01351574 | 0.02164118 | -43.2571587 | 0.56742841 |
| Q13443     | ADAM9     | 6+7+8+9 | 0 | -1.56505636 | 1.56505636 | 0.01378129 | 0.02185044 | -66.2035496 | 0.3379645  |
| O00571     | DDX3X     | 6+7+8+9 | 0 | -0.99973707 | 0.99973707 | 0.01431798 | 0.02241947 | -49.9908867 | 0.50009113 |
| P40305     | IFI27     | 6+7+8+9 | 0 | 2.26505438  | 2.26505438 | 0.01453076 | 0.02268909 | 380.672537  | 4.80672537 |
| P30740     | SERPINB1  | 6+7+8+9 | 0 | -1.36054232 | 1.36054232 | 0.01552575 | 0.02379237 | -61.0564129 | 0.38943587 |
| Q96QA5     | GSDMA     | 6+7+8+9 | 0 | -2.27659148 | 2.27659148 | 0.01597009 | 0.02433024 | -79.3615215 | 0.20638479 |
| Q10567     | AP1B1     | 6+7+8+9 | 0 | 2.90452146  | 2.90452146 | 0.0162645  | 0.02463918 | 648.76939   | 7.4876939  |
| P25445     | FAS       | 6+7+8+9 | 0 | -2.02941972 | 2.02941972 | 0.0162481  | 0.02463918 | -75.504642  | 0.24495358 |
| P24298     | GPT       | 6+7+8+9 | 0 | -1.45634943 | 1.45634943 | 0.01654618 | 0.02489721 | -63.5585929 | 0.36441407 |
| Q9ULK6     | RNF150    | 6+7+8+9 | 0 | -3.10559399 | 3.10559399 | 0.01659977 | 0.02494428 | -88.3822225 | 0.11617778 |
| P15880     | RPS2      | 6+7+8+9 | 0 | -0.89537416 | 0.89537416 | 0.01772347 | 0.02617549 | -46.2392251 | 0.53760775 |
| Q8WWT9     | SLC13A3   | 6+7+8+9 | 0 | -1.26289221 | 1.26289221 | 0.0178878  | 0.0263139  | -58.3292262 | 0.41670774 |
| P12081     | HARS      | 6+7+8+9 | 0 | -0.82237319 | 0.82237319 | 0.01794166 | 0.02635844 | -43.448907  | 0.56551093 |
| P20933     | AGA       | 6+7+8+9 | 0 | -0.96763149 | 0.96763149 | 0.01813189 | 0.02646404 | -48.8655136 | 0.51134486 |
| P11940     | PABPC1    | 6+7+8+9 | 0 | -1.44738873 | 1.44738873 | 0.01877649 | 0.02712489 | -63.3315479 | 0.36668452 |
| P02776     | PF4       | 6+7+8+9 | 0 | -1.21626497 | 1.21626497 | 0.01894785 | 0.02726344 | -56.9604462 | 0.43039554 |

|            |          |         |   |             |            |            |            |             |            |
|------------|----------|---------|---|-------------|------------|------------|------------|-------------|------------|
| Q96C19     | EFHD2    | 6+7+8+9 | 0 | -3.37719485 | 3.37719485 | 0.01929203 | 0.0276519  | -90.3758352 | 0.09624165 |
| Q6H9L7     | ISM2     | 6+7+8+9 | 0 | -1.20944282 | 1.20944282 | 0.01993949 | 0.02832574 | -56.7564406 | 0.43243559 |
| Q13162     | PRDX4    | 6+7+8+9 | 0 | -1.0499318  | 1.0499318  | 0.02021928 | 0.02861412 | -51.7009005 | 0.482991   |
| P30153     | PPP2R1A  | 6+7+8+9 | 0 | -1.34186785 | 1.34186785 | 0.02045825 | 0.02891571 | -60.5490444 | 0.39450956 |
| Q14134     | TRIM29   | 6+7+8+9 | 0 | -1.73387474 | 1.73387474 | 0.02112146 | 0.02940697 | -69.9356585 | 0.30064342 |
| P53384     | NUBP1    | 6+7+8+9 | 0 | 1.51359885  | 1.51359885 | 0.02106149 | 0.02940697 | 185.521394  | 2.85521394 |
| P02786     | TFRC     | 6+7+8+9 | 0 | -1.40369499 | 1.40369499 | 0.02121177 | 0.02949597 | -62.2040119 | 0.37795988 |
| P18084     | ITGB5    | 6+7+8+9 | 0 | -0.83402957 | 0.83402957 | 0.02175555 | 0.03005345 | -43.9039758 | 0.56096024 |
| P80303     | NUCB2    | 6+7+8+9 | 0 | -1.2327814  | 1.2327814  | 0.02198919 | 0.03023851 | -57.4503667 | 0.42549633 |
| P13500     | CCL2     | 6+7+8+9 | 0 | -1.93533591 | 1.93533591 | 0.0222056  | 0.03042385 | -73.8539649 | 0.26146035 |
| A0A075B611 | IGLV4-60 | 6+7+8+9 | 0 | -1.6231016  | 1.6231016  | 0.02235179 | 0.03054984 | -67.5363213 | 0.32463679 |
| Q99952     | PTPN18   | 6+7+8+9 | 0 | 1.0978562   | 1.0978562  | 0.02247805 | 0.03068433 | 114.036405  | 2.14036405 |
| P04083     | ANXA1    | 6+7+8+9 | 0 | -1.16501309 | 1.16501309 | 0.02458554 | 0.03264445 | -55.4039786 | 0.44596021 |
| P05164     | MPO      | 6+7+8+9 | 0 | -0.848105   | 0.848105   | 0.02458322 | 0.03264445 | -44.4486069 | 0.55551393 |
| Q06210     | GFPT1    | 6+7+8+9 | 0 | -0.93563948 | 0.93563948 | 0.02477509 | 0.03277651 | -47.718932  | 0.52281068 |
| O15400     | STX7     | 6+7+8+9 | 0 | -1.11529385 | 1.11529385 | 0.02505508 | 0.03284278 | -53.8402872 | 0.46159713 |
| Q9H2M3     | BHMT2    | 6+7+8+9 | 0 | -0.88828728 | 0.88828728 | 0.02610707 | 0.03386045 | -45.9744889 | 0.54025511 |
| O43760     | SYNGR2   | 6+7+8+9 | 0 | -0.88264131 | 0.88264131 | 0.02687633 | 0.03457737 | -45.7626464 | 0.54237354 |
| Q86VN1     | VPS36    | 6+7+8+9 | 0 | -1.28291151 | 1.28291151 | 0.02736072 | 0.03503927 | -58.90347   | 0.4109653  |
| Q02790     | FKBP4    | 6+7+8+9 | 0 | -1.46693067 | 1.46693067 | 0.02897689 | 0.03677203 | -63.8248893 | 0.36175111 |
| Q9UHB9     | SRP68    | 6+7+8+9 | 0 | 1.35473832  | 1.35473832 | 0.02910599 | 0.03685221 | 155.750722  | 2.55750722 |
| A0A075B610 | IGLV8-61 | 6+7+8+9 | 0 | -1.13392912 | 1.13392912 | 0.02919384 | 0.03692162 | -54.4326971 | 0.45567303 |
| Q7Z304     | MAMDC2   | 6+7+8+9 | 0 | -3.01449831 | 3.01449831 | 0.02952497 | 0.0371304  | -87.6249892 | 0.12375011 |
| Q8TF65     | GIPC2    | 6+7+8+9 | 0 | -0.99159802 | 0.99159802 | 0.02950455 | 0.0371304  | -49.7079599 | 0.5029204  |
| Q99674     | CGREF1   | 6+7+8+9 | 0 | -0.82539716 | 0.82539716 | 0.02949199 | 0.0371304  | -43.5673171 | 0.56432683 |
| Q08188     | TGM3     | 6+7+8+9 | 0 | -1.27434504 | 1.27434504 | 0.02960233 | 0.03718584 | -58.6587201 | 0.4134128  |
| Q6QNY0     | BLOC1S3  | 6+7+8+9 | 0 | 1.95880067  | 1.95880067 | 0.02986698 | 0.0374376  | 288.738681  | 3.88738681 |
| P02652     | APOA2    | 6+7+8+9 | 0 | -0.91636572 | 0.91636572 | 0.03033982 | 0.03781485 | -47.015794  | 0.52984206 |
| Q96FN5     | KIF12    | 6+7+8+9 | 0 | -0.92883889 | 0.92883889 | 0.03134299 | 0.03846483 | -47.4719072 | 0.52528093 |
| Q9Y266     | NUDC     | 6+7+8+9 | 0 | -2.77934697 | 2.77934697 | 0.03138981 | 0.03848005 | -85.4342386 | 0.14565762 |
| P35475     | IDUA     | 6+7+8+9 | 0 | -0.93362228 | 0.93362228 | 0.03150253 | 0.03857594 | -47.6457805 | 0.5235422  |
| O00194     | RAB27B   | 6+7+8+9 | 0 | -0.92774108 | 0.92774108 | 0.03167297 | 0.03874221 | -47.431921  | 0.52568079 |
| P03973     | SLPI     | 6+7+8+9 | 0 | -1.5726765  | 1.5726765  | 0.03189622 | 0.03888765 | -66.3815876 | 0.33618412 |
| P06748     | NPM1     | 6+7+8+9 | 0 | -1.58577124 | 1.58577124 | 0.03230275 | 0.03929342 | -66.6853473 | 0.33314653 |
| Q14203     | DCTN1    | 6+7+8+9 | 0 | -0.98541498 | 0.98541498 | 0.03237424 | 0.03929903 | -49.4919578 | 0.50508042 |
| Q96JI7     | SPG11    | 6+7+8+9 | 0 | 1.96706688  | 1.96706688 | 0.03303791 | 0.03983212 | 290.97243   | 3.9097243  |
| Q9BQB4     | SOST     | 6+7+8+9 | 0 | -0.84974685 | 0.84974685 | 0.033122   | 0.03983212 | -44.5117907 | 0.55488209 |
| P08236     | GUSB     | 6+7+8+9 | 0 | -2.30002262 | 2.30002262 | 0.03366664 | 0.04025982 | -79.6940084 | 0.20305992 |
| P02788     | LTF      | 6+7+8+9 | 0 | -1.04821047 | 1.04821047 | 0.03421482 | 0.0406938  | -51.6432386 | 0.48356761 |

|        |          |         |   |             |            |            |            |             |            |
|--------|----------|---------|---|-------------|------------|------------|------------|-------------|------------|
| P55209 | NAP1L1   | 6+7+8+9 | 0 | -1.25292263 | 1.25292263 | 0.03442791 | 0.04073059 | -58.0402678 | 0.41959732 |
| Q13093 | PLA2G7   | 6+7+8+9 | 0 | -0.91096753 | 0.91096753 | 0.03438872 | 0.04073059 | -46.8171696 | 0.5318283  |
| O75844 | ZMPSTE24 | 6+7+8+9 | 0 | -1.00738521 | 1.00738521 | 0.03458782 | 0.04079264 | -50.255298  | 0.49744702 |
| Q9NR12 | PDLIM7   | 6+7+8+9 | 0 | -2.29356151 | 2.29356151 | 0.03463992 | 0.04080531 | -79.6028641 | 0.20397136 |
| Q9UJJ9 | GNPTG    | 6+7+8+9 | 0 | -1.21308435 | 1.21308435 | 0.03480921 | 0.04092187 | -56.8654548 | 0.43134545 |
| Q02747 | GUCA2A   | 6+7+8+9 | 0 | -0.83757711 | 0.83757711 | 0.03548979 | 0.04133082 | -44.0417445 | 0.55958256 |
| O43586 | PSTPIP1  | 6+7+8+9 | 0 | -1.1064874  | 1.1064874  | 0.03728143 | 0.04301407 | -53.557659  | 0.46442341 |
| P26885 | FKBP2    | 6+7+8+9 | 0 | -1.34354615 | 1.34354615 | 0.03745667 | 0.04308288 | -60.5949113 | 0.39405089 |
| Q9Y490 | TLN1     | 6+7+8+9 | 0 | -0.81732762 | 0.81732762 | 0.03745056 | 0.04308288 | -43.2507836 | 0.56749216 |
| P62328 | TMSB4X   | 6+7+8+9 | 0 | 2.04304938  | 2.04304938 | 0.03779398 | 0.04342617 | 312.115687  | 4.12115687 |
| Q96KG7 | MEGF10   | 6+7+8+9 | 0 | -1.16112829 | 1.16112829 | 0.0378713  | 0.04343293 | -55.2837315 | 0.44716269 |
| P33241 | LSP1     | 6+7+8+9 | 0 | -1.47691615 | 1.47691615 | 0.0384932  | 0.04382424 | -64.0744078 | 0.35925592 |
| P20916 | MAG      | 6+7+8+9 | 0 | -1.07858884 | 1.07858884 | 0.04090532 | 0.0459204  | -52.6508262 | 0.47349174 |
| P56134 | ATP5MF   | 6+7+8+9 | 0 | 0.99962864  | 0.99962864 | 0.04136618 | 0.04634007 | 99.9485249  | 1.99948525 |
| Q9GZU7 | CTDSP1   | 6+7+8+9 | 0 | -0.99452025 | 0.99452025 | 0.04360978 | 0.0480352  | -49.8097253 | 0.50190275 |
| Q96G27 | WBP1     | 6+7+8+9 | 0 | 2.33531238  | 2.33531238 | 0.04575876 | 0.04991053 | 404.660223  | 5.04660223 |

**Table S4:** Top 25 biomarkers and two control molecules resulted from mass spectrometry screening. The upper part of the table shows the top 25 biomarkers upon ranking based on mass spectrometry results, as well as diagnostic performance (AUC and specificity), while the lower part indicates the two control molecules used in the study.

|            |          | Mass Spectrometry Analysis |          | ROC Curve Analysis |            |                         |         |                                |                                 |
|------------|----------|----------------------------|----------|--------------------|------------|-------------------------|---------|--------------------------------|---------------------------------|
|            | Genes    | Absolute Log2 Fold Change  | q-value  | AUC                | Std. Error | 95% Confidence Interval | p-value | Specificity at 90% Sensitivity | Specificity at 100% Sensitivity |
| BIOMARKERS | B2M      | 1.395                      | 2.33E-04 | 0.8261             | 0.064      | 0.7008 to 0.9514        | 0.0003  | 65.2                           | 13                              |
|            | VIPR1    | 1.452                      | 3.06E-05 | 0.817              | 0.067      | 0.6861 to 0.9480        | 0.0006  | 42.9                           | 38.1                            |
|            | CALR     | 0.86                       | 2.16E-07 | 0.8043             | 0.069      | 0.6699 to 0.9388        | 0.0007  | 47.8                           | 34.8                            |
|            | SERPINF1 | 1.039                      | 9.61E-09 | 0.8023             | 0.07       | 0.6659 to 0.9386        | 0.0008  | 68.2                           | 36.4                            |
|            | HPX      | 0.952                      | 1.58E-06 | 0.7761             | 0.07       | 0.6396 to 0.9125        | 0.0020  | 52.2                           | 39.1                            |
|            | IGFALS   | 1.1                        | 4.09E-04 | 0.7761             | 0.072      | 0.6348 to 0.9174        | 0.0020  | 56.5                           | 52.2                            |
|            | KRT2     | 2.176                      | 3.65E-04 | 0.7696             | 0.074      | 0.6250 to 0.9142        | 0.0025  | 56.5                           | 13                              |

|          |         |       |          |        |       |                  |        |      |      |
|----------|---------|-------|----------|--------|-------|------------------|--------|------|------|
|          | HRNR    | 1.912 | 2.91E-04 | 0.7522 | 0.076 | 0.6033 to 0.9010 | 0.0047 | 47.8 | 13   |
|          | APOA1   | 1.214 | 1.40E-05 | 0.7435 | 0.077 | 0.5930 to 0.8939 | 0.0064 | 52.2 | 17.4 |
|          | GPR180  | 0.998 | 1.28E-04 | 0.7432 | 0.079 | 0.5883 to 0.8980 | 0.0070 | 27.3 | 13.6 |
|          | KRT13   | 2.235 | 4.60E-04 | 0.7391 | 0.075 | 0.5913 to 0.8869 | 0.0074 | 52.2 | 30.4 |
|          | LRRC15  | 0.983 | 1.48E-04 | 0.7425 | 0.078 | 0.5902 to 0.8948 | 0.0087 | 40   | 20   |
|          | APOA4   | 0.855 | 1.15E-05 | 0.7174 | 0.079 | 0.5634 to 0.8714 | 0.0149 | 52.2 | 26.1 |
|          | JUP     | 1.848 | 4.76E-04 | 0.7185 | 0.08  | 0.5614 to 0.8757 | 0.0158 | 21.7 | 17.4 |
|          | ATP5F1A | 2.155 | 2.26E-04 | 0.7071 | 0.081 | 0.5487 to 0.8655 | 0.0222 | 43.5 | 21.7 |
|          | DCD     | 1.915 | 2.13E-04 | 0.6978 | 0.082 | 0.5375 to 0.8581 | 0.0267 | 52.2 | 21.7 |
|          | CANX    | 1.045 | 1.99E-05 | 0.7043 | 0.085 | 0.5377 to 0.8708 | 0.0273 | 47.6 | 38.1 |
|          | MXRA8   | 0.904 | 1.29E-04 | 0.6891 | 0.08  | 0.5314 to 0.8469 | 0.0341 | 34.8 | 21.7 |
|          | SCGB1A1 | 1.412 | 3.30E-04 | 0.687  | 0.081 | 0.5273 to 0.8466 | 0.0363 | 34.8 | 17.4 |
|          | RNASE1  | 1.07  | 4.09E-04 | 0.687  | 0.082 | 0.5270 to 0.8470 | 0.0363 | 26.1 | 17.4 |
|          | PNP     | 5.845 | 1.10E-05 | 0.6739 | 0.082 | 0.5126 to 0.8352 | 0.0514 | 34.8 | 30.4 |
|          | CD99    | 1.231 | 1.40E-05 | 0.675  | 0.083 | 0.5114 to 0.8386 | 0.0525 | 36.4 | 31.8 |
|          | FCER2   | 0.834 | 5.78E-05 | 0.6717 | 0.084 | 0.5075 to 0.8360 | 0.0544 | 52.2 | 30.4 |
|          | VAT1    | 0.951 | 9.46E-05 | 0.6717 | 0.084 | 0.5077 to 0.8358 | 0.0544 | 52.2 | 17.4 |
|          | SCUBE3  | 1.485 | 2.03E-05 | 0.6746 | 0.086 | 0.5055 to 0.8438 | 0.0563 | 50   | 22.7 |
| CONTROLS | CD44    | 0.065 | 0.32     | 0.5717 | 0.091 | 0.3936 to 0.7499 | 0.4217 | 13.0 | 4.3  |
|          | RNASE2  | 0.065 | 0.32     | 0.5326 | 0.090 | 0.3553 to 0.7099 | 0.7149 | 13.0 | 4.3  |

**Table S5:** Statistical analysis of the biomarkers’ mass-spectrometry and ELISA quantification results. The table indicates the Minimum (Min), Maximum (Max), Mean, Median, Standard Error of the Mean (SEM) and Standard Deviation (SD) for both the mass spectrometry and the ELISA results (graphically represented as box-plots in Figure 2 and 3).

|                                 |        | PEDF      |            | HPX        |            | CD99      |            | FCER2     |            | KRT13      |            | HRNR      |            | CANX      |            |
|---------------------------------|--------|-----------|------------|------------|------------|-----------|------------|-----------|------------|------------|------------|-----------|------------|-----------|------------|
| Mass Spectrometry<br>(Figure 2) |        | No Tumor  | Tumor      | No Tumor   | Tumor      | No Tumor  | Tumor      | No Tumor  | Tumor      | No Tumor   | Tumor      | No Tumor  | Tumor      | No Tumor  | Tumor      |
|                                 | Min    | 20587.0   | 20875.5    | 3759929.8  | 2856963.3  | 104718.1  | 74844.9    | 29750.7   | 34719.7    | 293610.6   | 184933.7   | 7521.8    | 3852.5     | 7840.5    | 12820.1    |
|                                 | Max    | 223883.1  | 91576.5    | 25157592.0 | 9157538.0  | 3106647.0 | 1400008.5  | 986700.9  | 388217.0   | 39971668.0 | 3095748.8  | 654237.6  | 99452.6    | 167766.2  | 79652.4    |
|                                 | Mean   | 93196.7   | 45345.5    | 10687672.6 | 5522924.9  | 1057592.1 | 450481.5   | 311839.3  | 174952.7   | 4303372.0  | 914048.0   | 78622.9   | 20893.1    | 70107.4   | 33976.0    |
|                                 | Median | 80240.9   | 43947.5    | 8246233.0  | 5110637.8  | 620543.2  | 323484.1   | 277933.0  | 142632.9   | 1996926.8  | 597343.1   | 28265.2   | 14847.2    | 47928.3   | 30632.6    |
|                                 | SEM    | 10836.5   | 4553.8     | 1413418.9  | 428909.6   | 207774.4  | 78865.1    | 49249.3   | 19977.9    | 1781308.1  | 167487.6   | 29534.0   | 4577.7     | 10702.0   | 3718.1     |
|                                 | SD     | 51970.0   | 20365.0    | 6778519.0  | 1918142.2  | 996451.1  | 352695.6   | 236191.6  | 89344.1    | 8542853.6  | 749027.4   | 141640.3  | 20471.9    | 51324.8   | 16627.7    |
| ELISA Validation<br>(Figure 3A) |        | No Tumor  | Tumor      | No Tumor   | Tumor      | No Tumor  | Tumor      | No Tumor  | Tumor      | No Tumor   | Tumor      | No Tumor  | Tumor      | No Tumor  | Tumor      |
|                                 | Min    | 0.002     | 0.000      | 0.038      | 0.007      | 0.002     | 0.001      | 1.175     | 0.335      | 0.033      | 0.003      | 0.000     | 0.000      | 0.002     | 0.000      |
|                                 | Max    | 0.547     | 0.037      | 2.228      | 0.375      | 0.342     | 0.022      | 409.079   | 58.690     | 1.006      | 0.276      | 1418.180  | 171.853    | 0.217     | 0.054      |
|                                 | Mean   | 0.057     | 0.009      | 0.569      | 0.110      | 0.049     | 0.009      | 47.447    | 9.005      | 0.327      | 0.086      | 154.747   | 22.338     | 0.049     | 0.012      |
|                                 | Median | 0.012     | 0.004      | 0.144      | 0.082      | 0.022     | 0.004      | 10.975    | 3.907      | 0.192      | 0.033      | 25.364    | 5.052      | 0.018     | 0.004      |
|                                 | SEM    | 0.025     | 0.002      | 0.143      | 0.025      | 0.018     | 0.002      | 20.672    | 3.009      | 0.063      | 0.021      | 71.016    | 8.712      | 0.014     | 0.004      |
|                                 | SD     | 0.118     | 0.011      | 0.684      | 0.113      | 0.084     | 0.008      | 99.140    | 13.458     | 0.303      | 0.095      | 340.581   | 38.961     | 0.066     | 0.016      |
| ELISA Validation<br>(Figure 3B) |        | Low grade | High-grade | Low grade  | High-grade | Low grade | High-grade | Low grade | High-grade | Low grade  | High-grade | Low grade | High-grade | Low grade | High-grade |
|                                 | Min    | 0.001     | 0.000      | 0.031      | 0.007      | 0.001     | 0.001      | 0.818     | 0.335      | 0.018      | 0.003      | 0.000     | 0.000      | 0.000     | 0.000      |
|                                 | Max    | 0.547     | 0.033      | 2.228      | 0.375      | 0.342     | 0.022      | 409.079   | 58.690     | 1.006      | 0.276      | 1418.180  | 171.853    | 0.217     | 0.054      |
|                                 | Mean   | 0.051     | 0.008      | 0.506      | 0.101      | 0.043     | 0.009      | 41.782    | 8.956      | 0.292      | 0.085      | 134.851   | 22.809     | 0.043     | 0.012      |
|                                 | Median | 0.012     | 0.004      | 0.137      | 0.082      | 0.015     | 0.004      | 10.893    | 3.907      | 0.180      | 0.033      | 25.033    | 5.052      | 0.014     | 0.004      |
|                                 | SEM    | 0.021     | 0.002      | 0.125      | 0.026      | 0.015     | 0.002      | 17.767    | 3.574      | 0.057      | 0.024      | 61.033    | 10.642     | 0.012     | 0.004      |
|                                 | SD     | 0.110     | 0.010      | 0.650      | 0.104      | 0.079     | 0.008      | 92.319    | 14.296     | 0.294      | 0.095      | 317.138   | 42.569     | 0.063     | 0.017      |

**Table S6:** Immunohistochemical staining of eleven prostate adenocarcinoma cases. Expression of biomarkers in malignant and benign gland areas were evaluated with a four-tired score (0= negative, 1=weak, 2=moderate, 3=strong) and the extend of stained areas was estimated in 10% increments.

| Biomarker | Patient | GS | Benign intensity | Benign percentage | Staining cell type (0=luminal, 1=basal, 2=both) | Note                       | Malignant intensity | Malignant percentage | Note               |
|-----------|---------|----|------------------|-------------------|-------------------------------------------------|----------------------------|---------------------|----------------------|--------------------|
| PEDF      | 1       | 7a | 1                | 10                | 2                                               | cytoplasm                  | 0                   | 100                  |                    |
|           | 2       | 7a | 1                | 70                | 0                                               | cytoplasm                  | 1                   | 10                   | cytoplasm          |
|           | 3       | 7b | 1                | < 10%             | 2                                               | cytoplasm                  | 1                   | 40                   | cytoplasm/nucleus  |
|           | 4       | 7b | 1                | 40                | 2                                               | cytoplasm/membrane         | 1                   | 40                   | cytoplasm          |
|           | 5       | 7b | 1                | 100               | 2                                               | cytoplasm                  | 1                   | 40                   | cytoplasm          |
|           | 6       | 7b | 1                | 80                | 2                                               | cytoplasm                  | 1                   | 60                   | cytoplasm          |
|           | 7       | 8  | 2                | < 10%             | 1                                               | cytoplasm                  | 1                   | 30                   | cytoplasm          |
|           | 8       | 9a | 1                | 50                | 2                                               | cytoplasm                  | 1                   | 90                   | cytoplasm          |
|           | 9       | 9a | 1                | < 10%             | 0                                               | cytoplasm                  | 1                   | 20                   | cytoplasm          |
|           | 10      | 9a | 1                | 30                | 2                                               | cytoplasm                  | 1                   | 10                   | cytoplasm          |
|           | 11      | 9a | 1                | 80                | 2                                               | cytoplasm                  | 1                   | 30                   | cytoplasm          |
| HPX       | 1       | 7a | 1                | 100               | 2                                               | cytoplasm/membrane         | 1                   | 100                  | cytoplasm/membrane |
|           | 2       | 7a | 3                | 100               | 2                                               | cytoplasm/membrane/nucleus | 2                   | 100                  | cytoplasm/membrane |
|           | 3       | 7b | 2                | 100               | 2                                               | cytoplasm/membrane         | 2                   | 100                  | cytoplasm/membrane |
|           | 4       | 7b | 1                | 100               | 2                                               | cytoplasm/membrane/nucleus | 1                   | 100                  | cytoplasm          |
|           | 5       | 7b | 3                | 90                | 2                                               | cytoplasm/membrane/nucleus | 3                   | 100                  | cytoplasm/membrane |
|           | 6       | 7b | 1                | 100               | 2                                               | cytoplasm/membrane/nucleus | 1                   | 100                  | cytoplasm/membrane |
|           | 7       | 8  | 2                | 100               | 2                                               | cytoplasm/membrane         | 1                   | 100                  | cytoplasm/membrane |
|           | 8       | 9a | 1                | 100               | 2                                               | cytoplasm/membrane/nucleus | 2                   | 100                  | cytoplasm/membrane |
|           | 9       | 9a | 2                | 60                | 2                                               | cytoplasm/membrane/nucleus | 1                   | 100                  | cytoplasm          |
|           | 10      | 9a | 1                | 100               | 2                                               | cytoplasm/membrane/nucleus | 1                   | 100                  | cytoplasm/membrane |
|           | 11      | 9a | 1                | 20                | 2                                               | cytoplasm/membrane/nucleus | 1                   | 100                  | cytoplasm/membrane |
| CD99      | 1       | 7a | 2                | 80                | 2                                               | dot like/membrane          | 1                   | 90                   | dot like/membrane  |
|           | 2       | 7a | 2                | 70                | 2                                               | dot like/membrane          | 2                   | 90                   | dot like           |
|           | 3       | 7b | 1                | 80                | 2                                               | dot like/membrane          | 2                   | 70                   | dot like           |
|           | 4       | 7b | 1                | 90                | 2                                               | dot like                   | 2                   | 20                   | dot like/membrane  |
|           | 5       | 7b | 2                | 90                | 2                                               | membrane                   | 1                   | 70                   | dot like           |
|           | 6       | 7b | 2                | 60                | 0                                               | dot like/membrane          | 1                   | 40                   | dot like           |
|           | 7       | 8  | 2                | 80                | 0                                               | dot like                   | 2                   | 70                   | dot like           |
|           | 8       | 9a | 2                | 90                | 2                                               | dot like                   | 1                   | 80                   | dot like/membrane  |
|           | 9       | 9a | 2                | 60                | 0                                               | dot like                   | 1                   | 30                   | dot like           |
|           | 10      | 9a | 2                | 80                | 0                                               | dot like                   | 2                   | 80                   | dot like           |
|           | 11      | 9a | 1                | 40                | 0                                               | dot like                   | 2                   | 80                   | dot like/membrane  |
| CANX      | 1       | 7a | 3                | 100               | 2                                               | cytoplasm/membrane         | 3                   | 100                  | cytoplasm/membrane |
|           | 2       | 7a | 3                | 100               | 2                                               | cytoplasm                  | 3                   | 100                  | cytoplasm          |
|           | 3       | 7b | 3                | 100               | 2                                               | cytoplasm/membrane         | 2                   | 100                  | cytoplasm/membrane |
|           | 4       | 7b | 3                | 100               | 2                                               | cytoplasm/membrane         | 2                   | 100                  | cytoplasm          |
|           | 5       | 7b | 3                | 100               | 2                                               | cytoplasm                  | 3                   | 100                  | cytoplasm          |

|       |    |    |   |     |   |                                 |   |     |                    |
|-------|----|----|---|-----|---|---------------------------------|---|-----|--------------------|
|       | 6  | 7b | 3 | 100 | 2 | cytoplasm/membrane              | 2 | 100 | cytoplasm          |
|       | 7  | 8  | 2 | 100 | 2 | cytoplasm/membrane              | 2 | 100 | cytoplasm/membrane |
|       | 8  | 9a | 3 | 100 | 2 | cytoplasm                       | 2 | 100 | cytoplasm/membrane |
|       | 9  | 9a | 3 | 100 | 2 | cytoplasm                       | 2 | 100 | cytoplasm          |
|       | 10 | 9a | 2 | 100 | 2 | cytoplasm/membrane              | 3 | 90  | cytoplasm          |
|       | 11 | 9a | 2 | 100 | 2 | cytoplasm                       | 2 | 100 | cytoplasm/membrane |
| FCER2 | 1  | 7a | 0 | 100 |   |                                 | 0 | 100 |                    |
|       | 2  | 7a | 0 | 100 |   |                                 | 0 | 100 |                    |
|       | 3  | 7b | 0 | 100 |   |                                 | 0 | 100 |                    |
|       | 4  | 7b | 0 | 100 |   |                                 | 0 | 100 |                    |
|       | 5  | 7b | 0 | 100 |   |                                 | 0 | 100 |                    |
|       | 6  | 7b | 0 | 100 |   |                                 | 0 | 100 |                    |
|       | 7  | 8  | 0 | 100 |   |                                 | 0 | 100 |                    |
|       | 8  | 9a | 0 | 100 |   |                                 | 0 | 100 |                    |
|       | 9  | 9a | 0 | 100 |   |                                 | 0 | 100 |                    |
|       | 10 | 9a | 0 | 100 |   |                                 | 0 | 100 |                    |
|       | 11 | 9a | 0 | 100 |   |                                 | 0 | 100 |                    |
| HRNR  | 1  | 7a | 1 | 80  | 2 | cytoplasm                       | 1 | 100 | cytoplasm          |
|       | 2  | 7a | 1 | 40  | 0 | dot like/cytoplasm              | 3 | 100 | dot like/cytoplasm |
|       | 3  | 7b | 1 | 60  | 2 | cytoplasm/dot like              | 1 | 50  | dot like/cytoplasm |
|       | 4  | 7b | 1 | 10  | 0 | dot like                        | 1 | 100 | dot like/cytoplasm |
|       | 5  | 7b | 1 | 50  | 2 | dot like/cytoplasm              | 2 | 90  | cytoplasm          |
|       | 6  | 7b | 1 | 90  | 0 | dot like/cytoplasm              | 1 | 50  | dot like/cytoplasm |
|       | 7  | 8  | 1 | 90  | 2 | cytoplasm/dot like              | 1 | 70  | cytoplasm          |
|       | 8  | 9a | 1 | 90  | 2 | cytoplasm/dot like              | 1 | 100 | dot like/cytoplasm |
|       | 9  | 9a | 1 | 100 | 2 | cytoplasm/dot like              | 1 | 100 | cytoplasm          |
|       | 10 | 9a | 1 | 10  | 2 | cytoplasm/dot like              | 1 | 20  | cytoplasm          |
|       | 11 | 9a | 1 | 100 | 2 | cytoplasm                       | 1 | 100 | cytoplasm/dot like |
| KRT13 | 1  | 7a | 2 | 40  | 1 | staining mainly peripheral zone | 0 | 100 |                    |
|       | 2  | 7a | 3 | 40  | 1 |                                 | 0 | 100 |                    |
|       | 3  | 7b | 2 | 30  | 1 |                                 | 0 | 100 |                    |
|       | 4  | 7b | 2 | 30  | 1 |                                 | 0 | 100 |                    |
|       | 5  | 7b | 2 | 20  | 1 |                                 | 0 | 100 |                    |
|       | 6  | 7b | 2 | 10  | 1 |                                 | 0 | 100 |                    |
|       | 7  | 8  | 2 | 40  | 1 |                                 | 0 | 100 |                    |
|       | 8  | 9a | 2 | 20  | 1 |                                 | 0 | 100 |                    |
|       | 9  | 9a | 3 | 70  | 1 |                                 | 0 | 100 |                    |
|       | 10 | 9a | 2 | 20  | 1 |                                 | 0 | 100 |                    |
|       | 11 | 9a | 2 | 70  | 1 |                                 | 0 | 100 |                    |
